# Supplementary material for: Notch Signaling Coordinates Progenitor Cell-Mediated Biliary Regeneration Following Partial Hepatectomy
Source: PubMed Central journal article supplement (PMC4782135; doi:10.1038/srep22754), 2016-03-08
Supplement: srep22754-s1.pdf [file srep22754-s1.pdf]

## Supplementary information

### **Notch Signaling Coordinates Progenitor Cell-Mediated Biliary Regeneration Following Partial Hepatectomy**

Jie Lu<sup>1</sup>, Yingqun Zhou<sup>1</sup>, Tianyuan Hu<sup>2</sup>, Hui Zhang<sup>2</sup>, Miao Shen<sup>1</sup>, Ping Cheng<sup>1</sup>, Weiqi Dai<sup>1</sup>, Fan Wang<sup>1</sup>, Kan Chen<sup>1</sup>, Yan Zhang<sup>1</sup>, Chengfeng Wang<sup>1</sup>, Jingjing Li<sup>1</sup>, Yuanyuan Zheng<sup>1</sup>, Jing Yang<sup>1</sup>, Rong Zhu<sup>1</sup>, Jianrong Wang<sup>1</sup>, Wenxia Lu<sup>1</sup>, Huawei Zhang<sup>1</sup>, Junshan Wang<sup>1</sup>, Yujing Xia<sup>1</sup>, Thiago M. De Assuncao<sup>3</sup>, Nidhi Jalan-Sakrikar<sup>3</sup>, Robert C. Huebert<sup>3</sup>, Bin Zhou<sup>2#</sup>, and Chuanyong Guo<sup>1#</sup>

*<sup>1</sup>Department of Gastroenterology, Shanghai 10th People's Hospital, Tongji University School of Medicine, Shanghai, People's Republic of China.*

*<sup>2</sup>Institute for Nutritional Sciences, Shanghai Institutes for Biological Sciences, Chinese Academy of Sciences, Shanghai, People's Republic of China.*

*<sup>3</sup>Division of Gastroenterology and Hepatology; Mayo Clinic and Foundation, Rochester, MN.*

**Supplementary Table S1: Primer sequence for genotyping**

| Name                         | Forward/Reverse Sequence                                                                                    |
|------------------------------|-------------------------------------------------------------------------------------------------------------|
| Alb-Cre                      | 5'-GCAAACATACGCAAGGGATT-3',<br>5'-AGGCAAATTTTGGTGTACGG-3'                                                   |
| Mx1-Cre                      | 5'-CCGGTCGATGCAACGAGTGATGAGG-3',<br>5'-GCCTCCAGCTTGCATGATCTCCGG-3'                                          |
| RBPJ <sup>flox/+</sup>       | 5'-GTTCTTAACCTGTTGGTCGGAACC-3',<br>5'-GCTTGAGGCTTGATGTTCTGTTCTGTATTGC-3',<br>5'-GCAATCCATCTTGTTC AATGGCC-3' |
| Rosa26 <sup>laz/+</sup>      | 5'-GGAGCGGGAGAAATGGATATG-3',<br>5'-AAAGTCGCTCTGAGTTGTTAT-3',<br>5'-GCGAAGAGTTTGTCTCAACC-3'                  |
| Rosa26 <sup>mTm</sup><br>G/+ | 5'-CTCTGCTGCCTCCTGGCTTCT-3',<br>5'-CGAGGCGGATCACAAGCAATA-3',<br>5'-TCAATGGGCGGGGGTTCGT-3'                   |

**Supplementary Table S2: Primer sequence for PCR.**

| Name           | Forward/Reverse Sequence                                                                                                         |
|----------------|----------------------------------------------------------------------------------------------------------------------------------|
| $\beta$ -Actin | 5'-CATCCGTA AAGACCTCTATGCCAA C-3',<br>5'-ATG GAG CCA CCG ATC CAC A-3'                                                            |
| Notch1         | 5'-GATGGCCTCAATGGGTACAAG-3',<br>5'-TCGTTGTTGTTGATGTCACAGT-3'<br>5'-GATGGCCTCAATGGGTACAAG-3',<br>5'-TCGTTGTTGTTGATGTCACAGT-3'     |
| Notch2         | 5'-GAGAAAAACCGCTGTCAGAATGG-3',<br>5'-GGTGGAGTATTGGCAGTCCTC-3'<br>5'-GAGAAAAACCGCTGTCAGAATGG-3',<br>5'-GAGAAAAACCGCTGTCAGAATGG-3' |
| Notch3         | 5'-AGTGCCGATCTGGTACA AACTT-3',<br>5'-CACTACGGGGTTCTCACACA-3'<br>5'-AGTGCCGATCTGGTACA AACTT-3',                                   |

---

5'-CACTACGGGGTTCTCACACA-3'  
 Notch4 5'-GAACGCGACATCAACGAGTG-3',  
 5'-GGAACCCAAGGTGTTATGGCA-3'  
 5'-CACTACGGGGTTCTCACACA-3',  
 5'-CACTACGGGGTTCTCACACA-3'  
 RBPJ 5'-AGTTGCACAGAAGTCTTACGG-3',  
 5'-CCTATTCCAATAAACGCACAGGG-3'  
 5'-AGTTGCACAGAAGTCTTACGG-3',  
 5'-AGTTGCACAGAAGTCTTACGG-3'  
 Hes1 5'-AAA GAC GGC CTC TGA GCA C-3',  
 5'-GGT GCT TCA CAG TCA TTT CCA-3'  
 5'-AGTTGCACAGAAGTCTTACGG-3',  
 5'-AGTTGCACAGAAGTCTTACGG-3'  
 Hey1 5'-CCGACGAGACCGAATCAATAAC-3',  
 5'-TCAGGTGATCCACAGTCATCTG-3'  
 5'-AGTTGCACAGAAGTCTTACGG-3',  
 5'-TCAGGTGATCCACAGTCATCTG-3'  
 CK7 5'-ACGGATGGGGCTAACTTACAA-3',  
 5'-AGTCCTCGATTTGCTCGAACT-3'  
 CK19 5'-G TTCAGTACGCATTGGGTCAG-3',  
 5'-GAGGACGAGGTCACGAAGC-3'  
 Alb 5'-CAAGAGTGAGATCGCCCATCG-3',  
 5'-T TACTTCCTGCACTAATTTGGCA-3'  
 AFP 5'-AGCTTCCACGTTAGATTCCTCC-3',  
 5'-ACAAACTGGGTAAAGGTGATGG-3'  
 Chip for 5'-CCCACATTTGTTATTTGAGCCC-3',  
 RBPJ-Y 5'-CCTGAACCATCCATCTCATGTTG-3'  
 AP 5'-ACATGAGATGGATGGTTCAGGG-3',  
 5'-AGTGAGCACAGGTGAAGGTCAGAG-3'

---

**Supplementary Table S3 Frequency of different genotyping.**

---

|           | Litter | AlbCre-<br>RBPJ fl/+ | Alb Cre-<br>RBPJ fl/fl | Alb Cre+<br>RBPJ fl/+ | AlbCre+<br>RBPJ fl/fl |
|-----------|--------|----------------------|------------------------|-----------------------|-----------------------|
| Number    | 30     | 62                   | 58                     | 64                    | 24                    |
| Frequency | /      | 0.298                | 0.279                  | 0.308                 | 0.115                 |

---

**Supplementary Table S4 Frequency of different genotyping.**

---

|           | Litter | Mx1Cre-<br>RBPJ fl/+ | Mx1 Cre-<br>RBPJ fl/fl | Mx1 Cre+<br>RBPJ fl/+ | Mx1 Cre+<br>RBPJ fl/fl |
|-----------|--------|----------------------|------------------------|-----------------------|------------------------|
| Number    | 42     | 70                   | 68                     | 65                    | 66                     |
| Frequency | /      | 0.260                | 0.253                  | 0.242                 | 0.245                  |

---

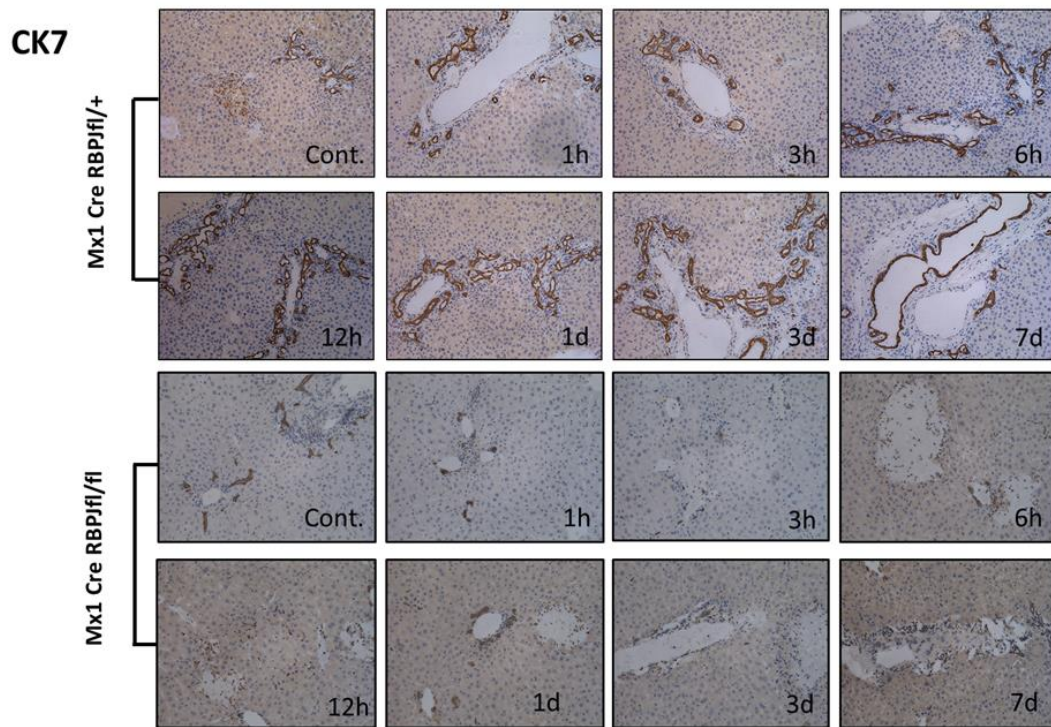

**Supplementary Figure S1: CK7 expression in different time points after PHx. In different time points (1hr, 3hr, 6hr, 12hr, 1day , 3days and 7days), IHC staining for CK7 was performed in Mx1 Cre RBPJ<sup>flox/+</sup> and Mx1Cre RBPJ<sup>flox/flox</sup>.**

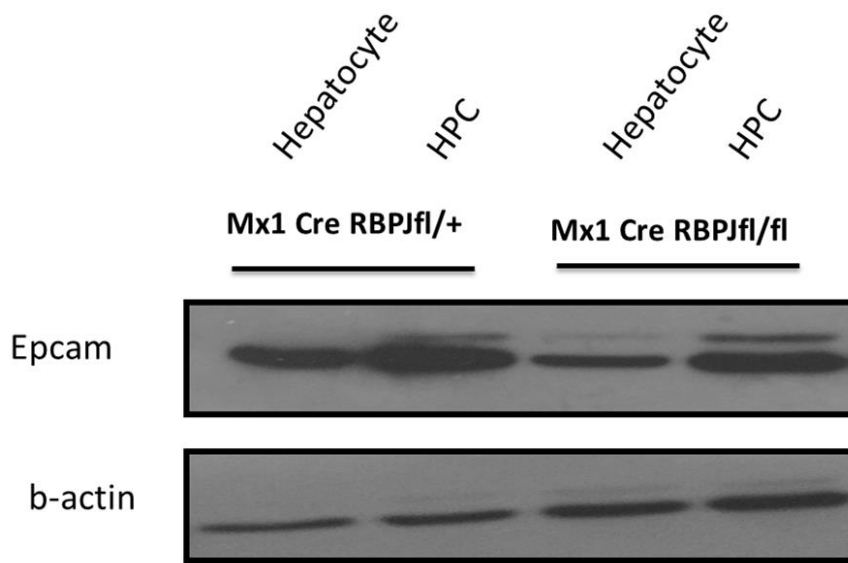

**Supplementary Figure S2: Western blotting of EPCAM in HPC and hepatocytes.**

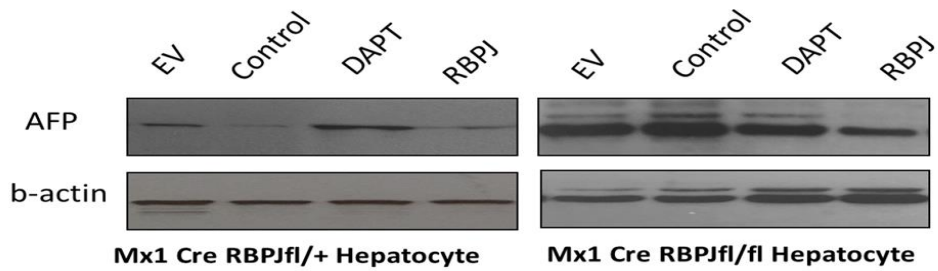

**Supplementary Figure S3: Western blotting of AFP in hepatocytes isolated from Mx1 Cre RBPJ<sup>flx/+</sup> and Mx1Cre RBPJ<sup>flx/flx</sup> mice.**

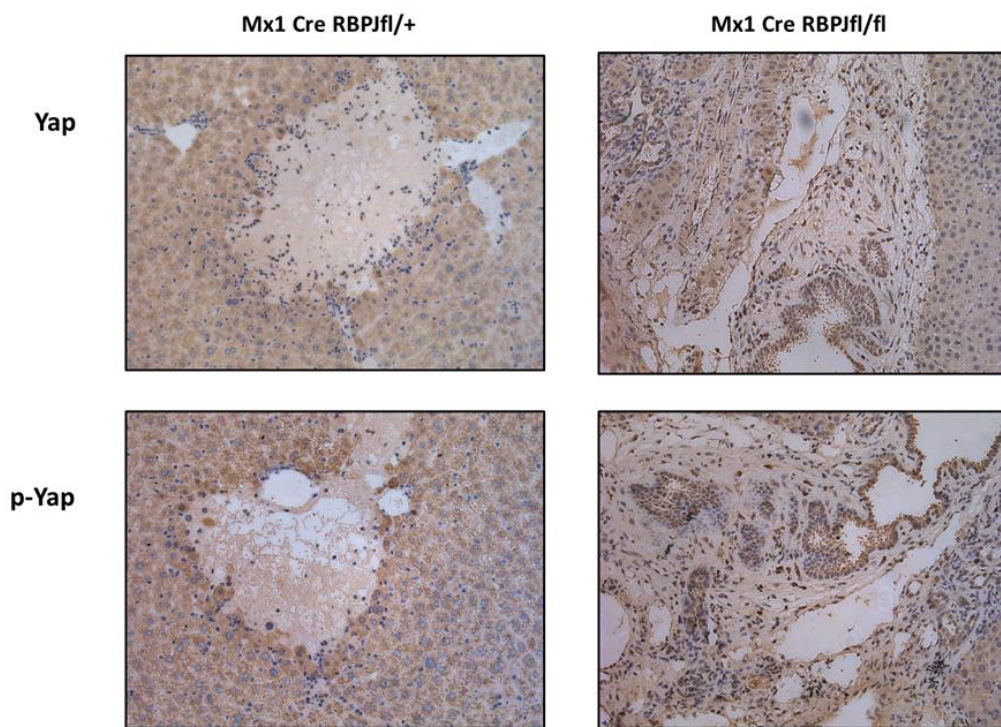

**Supplementary Figure S4: IHC staining of YAP and P-YAP in Mx1 Cre RBPJ<sup>fl/+</sup> and Mx1Cre RBPJ<sup>fl/fl</sup> mice.**
